# Supplementary material
Source: PubMed Central journal article supplement (PMC7024642)
Supplement: NIHMS1546924-supplement-2.pdf [file NIHMS1546924-supplement-2.pdf]

---

## Supplementary Data

### Table S1.

ITGB4-targeted immunotherapies with or without anti-PD-L1 did not significantly affect hematopoiesis. At the end of *in vivo* experiments, whole blood samples were collected using tubes with K2EDTA and analyzed by the In-Vivo Animal Core of University of Michigan. Hematologic analysis indicated no significant reduction of blood components Hb and PLT in animals treated with PBS, mITGB4-DC, anti-PD-L1, mITGB4-DC + anti-PD-L1, TDLN T-mITGB4 BiAb or TDLN T-mITGB4 BiAb + anti-PD-L1. Data are shown as the average levels of Hb and PLT in each group (n=5).

---

**Table S1**

|            | Normal range | PBS          | mITGB4-DC     | Anti-PDL1     | mITGB4-DC +Anti-PDL1 | TDLN T-mITGB4 BiAb | TDLN T-mITGB4 BiAb +Anti-PDL1 |
|------------|--------------|--------------|---------------|---------------|----------------------|--------------------|-------------------------------|
| Hb (g/dL)  | 11.0-15.1    | Normal (12)  | Normal (12.4) | Normal (12.9) | Normal (12.4)        | Normal (12.6)      | Normal (12.6)                 |
| PLT (K/uL) | 592.-2972.   | Normal (734) | Normal (900)  | Normal (877)  | Normal (708)         | Normal (1014)      | Normal (718)                  |
